# Supplementary material for: Extraocular Muscle Atrophy and Central Nervous System Involvement in Chronic Progressive External Ophthalmoplegia
Source: PubMed Central journal article supplement (PMC3785524; doi:10.1371/journal.pone.0075048), 2013-09-27
Supplement: pone.0075048.s002.pdf [file pone.0075048.s002.pdf]

**Figure S2: Boundary delineation of extraocular muscle cross-sections**

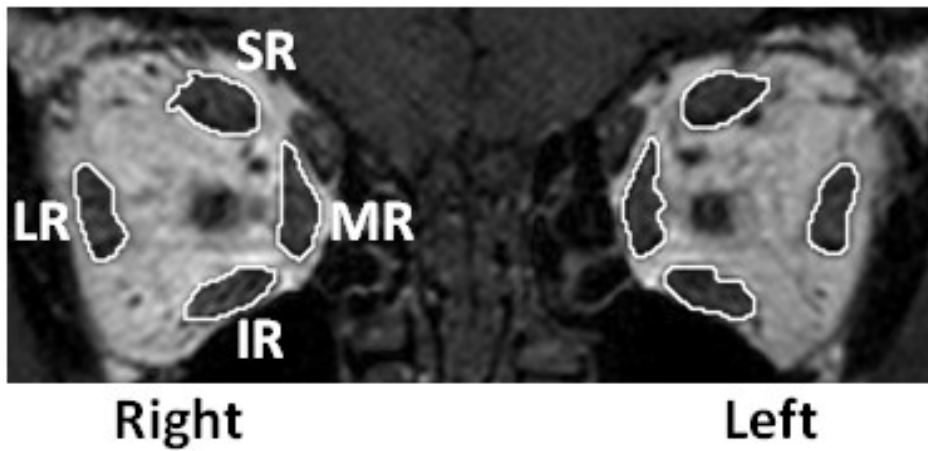

Coronal T1-weighted spin-echo MRI slice through the orbit with the boundaries of the recti muscles outlined. IR = inferior rectus; LR = lateral rectus; MR = medial rectus; SR = superior rectus.
