# Supplementary material for: Extraocular Muscle Atrophy and Central Nervous System Involvement in Chronic Progressive External Ophthalmoplegia
Source: PubMed Central journal article supplement (PMC3785524; doi:10.1371/journal.pone.0075048), 2013-09-27
Supplement: pone.0075048.s003.pdf [file pone.0075048.s003.pdf]

**Figure S3: Measurement protocol for brainstem and cerebellar volumes**

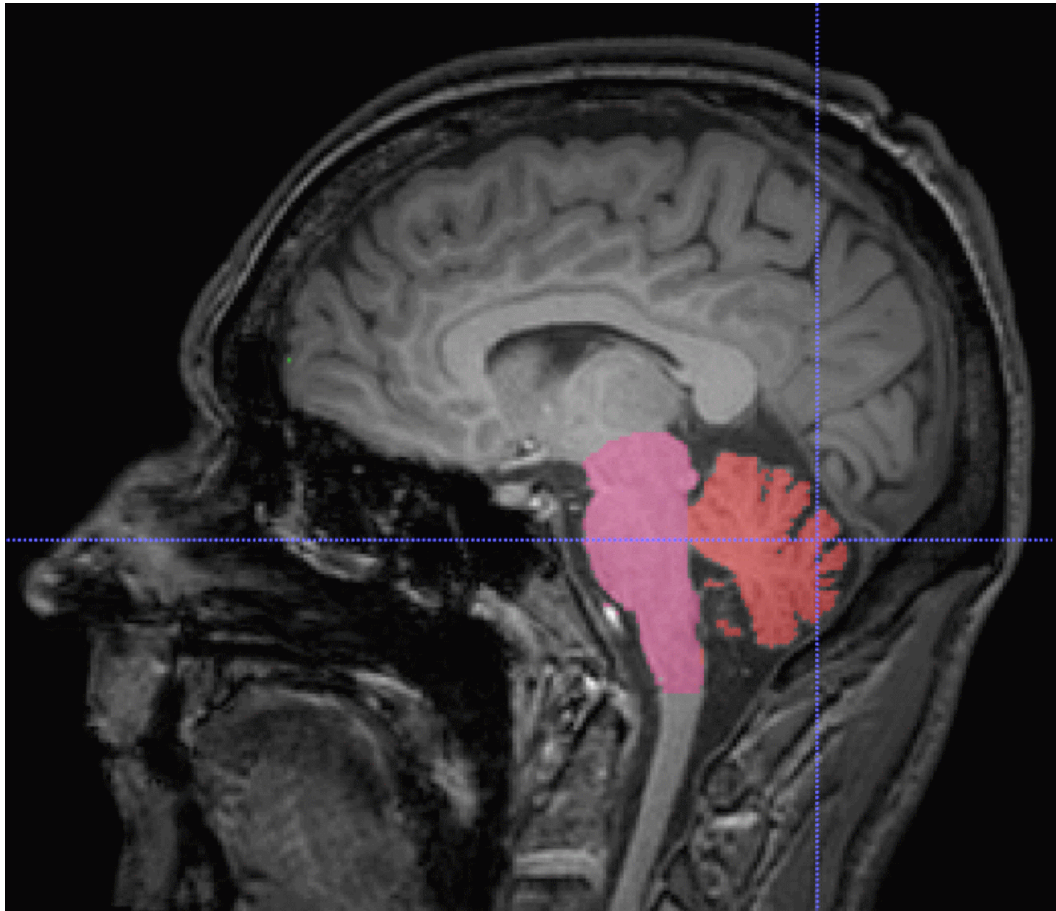

Sagittal T1-weighted MRI slice with the brainstem and cerebellar areas highlighted in pink and red, respectively.
